# Supplementary material for: Endoplasmic reticulum and lysosomal Ca2+ stores are remodelled in GBA1-linked Parkinson disease patient fibroblasts
Source: PubMed Central journal article supplement (PMC4751977; doi:10.1016/j.ceca.2015.11.002), 2016-01
Supplement: mmc1.pdf [file mmc1.pdf]

**Supplementary Table S1. Details of human fibroblasts used in this study.**

| Category | Identifier                 | Sex    | Age | Genotype            | Clinical features       |
|----------|----------------------------|--------|-----|---------------------|-------------------------|
| Young    | $GBAI^{wt/wt}_{55}$        | Female | 55  | WT/WT               | Apparently healthy      |
|          | $GBAI^{mut/mut}_{55}^{GD}$ | Male   | 55  | N370S/<br>1263del55 | Type I Gaucher Disease  |
|          | $GBAI^{wt/mut}_{55}^{PD}$  | Female | 55  | WT/N370S            | Parkinson Disease       |
|          | $GBAI^{wt/mut}_{58}^{ASX}$ | Male   | 58  | WT/N370S            | Non-manifesting carrier |
|          | $GBAI^{wt/mut}_{59}^{ASX}$ | Female | 59  | WT/N370S            | Non-manifesting carrier |
| Aged     | $GBAI^{wt/wt}_{70}$        | Female | 70  | WT/WT               | Apparently healthy      |
|          | $GBAI^{wt/wt}_{78}$        | Male   | 78  | WT/WT               | Apparently healthy      |
|          | $GBAI^{wt/mut}_{75}^{PD}$  | Female | 75  | WT/N370S            | Parkinson Disease       |
|          | $GBAI^{wt/wt}_{82}$        | Female | 82  | WT/WT               | Apparently healthy      |
|          | $GBAI^{wt/mut}_{80}^{ASX}$ | Female | 80  | WT/N370S            | Non-manifesting carrier |

**Fig. S1. Pathogenic *GBAI* disrupts ER and lysosomal  $\text{Ca}^{2+}$  content.** Summary data quantifying area under the curve measurements in cells stimulated with thapsigargin (**A-B**) or GPN (**C**). **A**, Thapsigargin responses in fibroblasts upon *GBAI* mutation. Data are expressed as a percentage of the indicated age-matched control and correspond to experiments described in Figures 1-2. **B**, Thapsigargin responses upon  $\beta$ -glucocerebrosidase inhibition. Data from fibroblasts (left) or SHSY5Y cells (middle, right) are expressed as a percentage of control cells not treated with CBE or cells expressing scrambled shRNA (*GBAI*<sup>+/+</sup>) and correspond to experiments described in Fig. 3. **C**, GPN responses in fibroblasts upon *GBAI* mutation or CBE treatment. Data are expressed as in B and correspond to experiments described in Fig. 5.

**Fig. S2. Pathogenic *GBAI* disrupts lysosomal morphology.** **A-C**, Representative confocal fluorescence images of LAMP2 staining (white) in *GBAI*<sup>wt/wt</sup><sub>55</sub>, *GBAI*<sup>mut/mut</sup><sub>55</sub><sup>GD</sup> and *GBAI*<sup>wt/mut</sup><sub>55</sub><sup>PD</sup> cells. Nuclei were stained with DAPI (blue). Zoomed images are displayed in the right panels. Scale bars, 10  $\mu\text{m}$ . **D-E**, Representative confocal fluorescence images of live *GBAI*<sup>wt/wt</sup><sub>55</sub> and *GBAI*<sup>wt/mut</sup><sub>55</sub><sup>PD</sup> cells labelled with LysoTracker red (100 nM, 15 min.). **F**, Summary data quantifying LAMP2 and LysoTracker intensity as a percentage of the control (48-130 cells). **G**, Western blot analysis using antibodies to LAMP1 (left) or LC3 (right) and homogenates prepared from *GBAI*<sup>wt/wt</sup><sub>55</sub>, *GBAI*<sup>mut/mut</sup><sub>55</sub><sup>GD</sup> and *GBAI*<sup>wt/mut</sup><sub>55</sub><sup>PD</sup> cells (21  $\mu\text{g}$ ). Blots were stripped and re-probed using an antibody to actin (bottom panels). Migration of molecular mass markers (in kDa) is shown on the right of the panels. Migration of LC3II is highlighted. Blots are representative of those using 3 independent homogenate preparations.

**Fig. S3. Effect of GPN on cytosolic  $\text{Ca}^{2+}$  and lysosome integrity.** **A**, Cytosolic  $\text{Ca}^{2+}$  release from individual fibroblasts stimulated with GPN (200  $\mu\text{M}$ ) from a representative population of *GBAI*<sup>wt/wt</sup><sub>55</sub>, *GBAI*<sup>mut/mut</sup><sub>55</sub><sup>GD</sup> and *GBAI*<sup>wt/mut</sup><sub>55</sub><sup>PD</sup> cells. **B**, Summary data quantifying percentage of cells that oscillated in response to GPN. Data are from 2 independent passages analysing 118-120 cells. **C**, LysoTracker red responses of fibroblasts (representative population average) stimulated with GPN (200  $\mu\text{M}$ ). **D**, Summary data quantifying the time taken to reach a half-maximal loss of LysoTracker red fluorescence (25-34 cells).

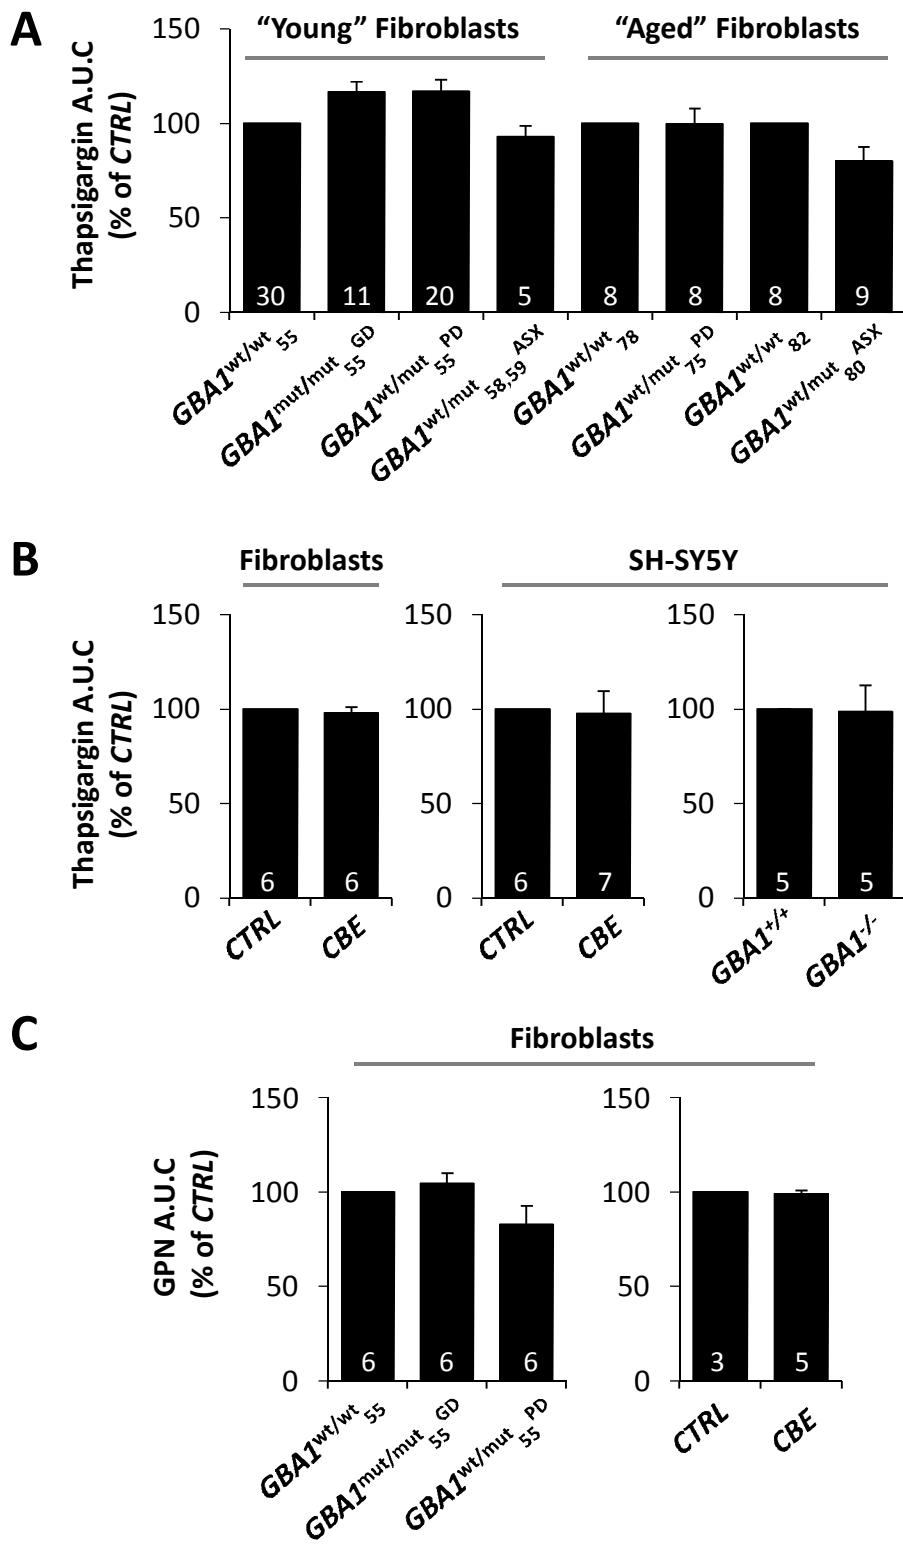

Fig. S1.

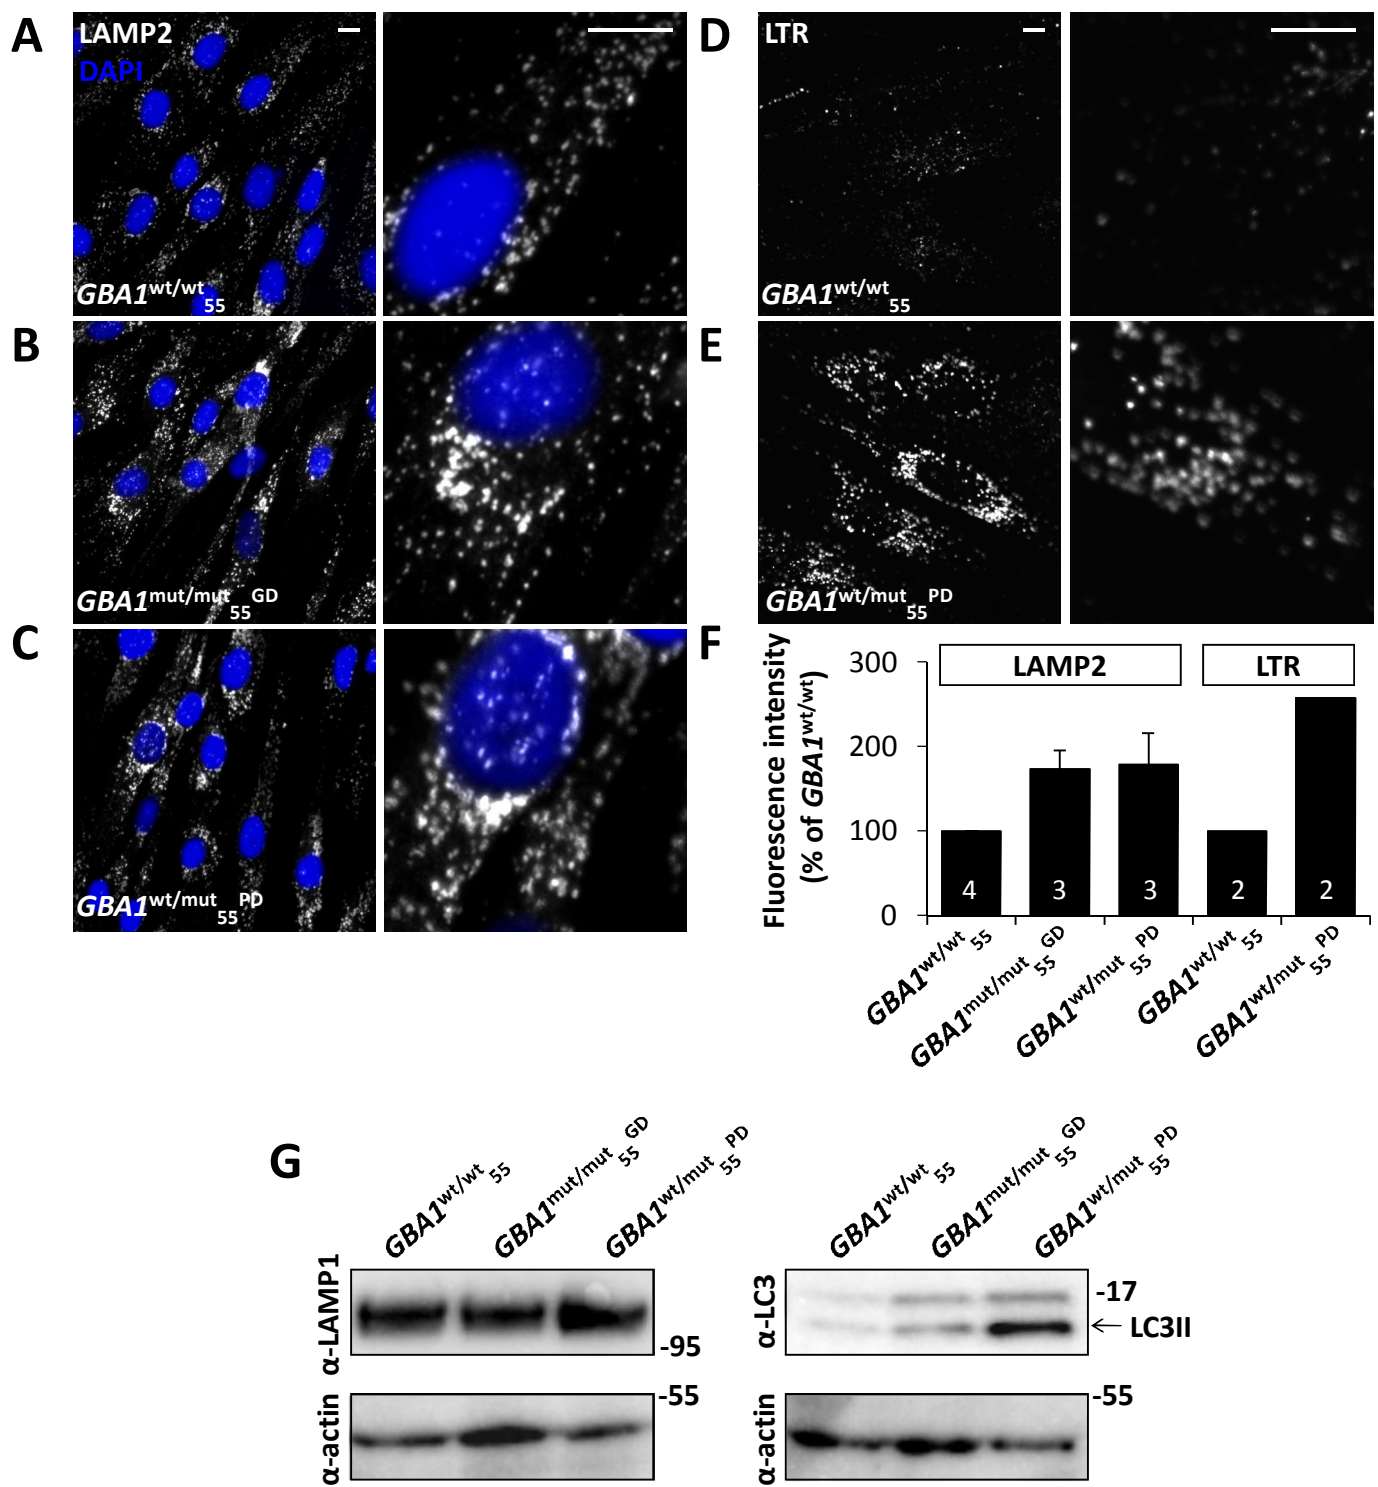

Fig. S2.

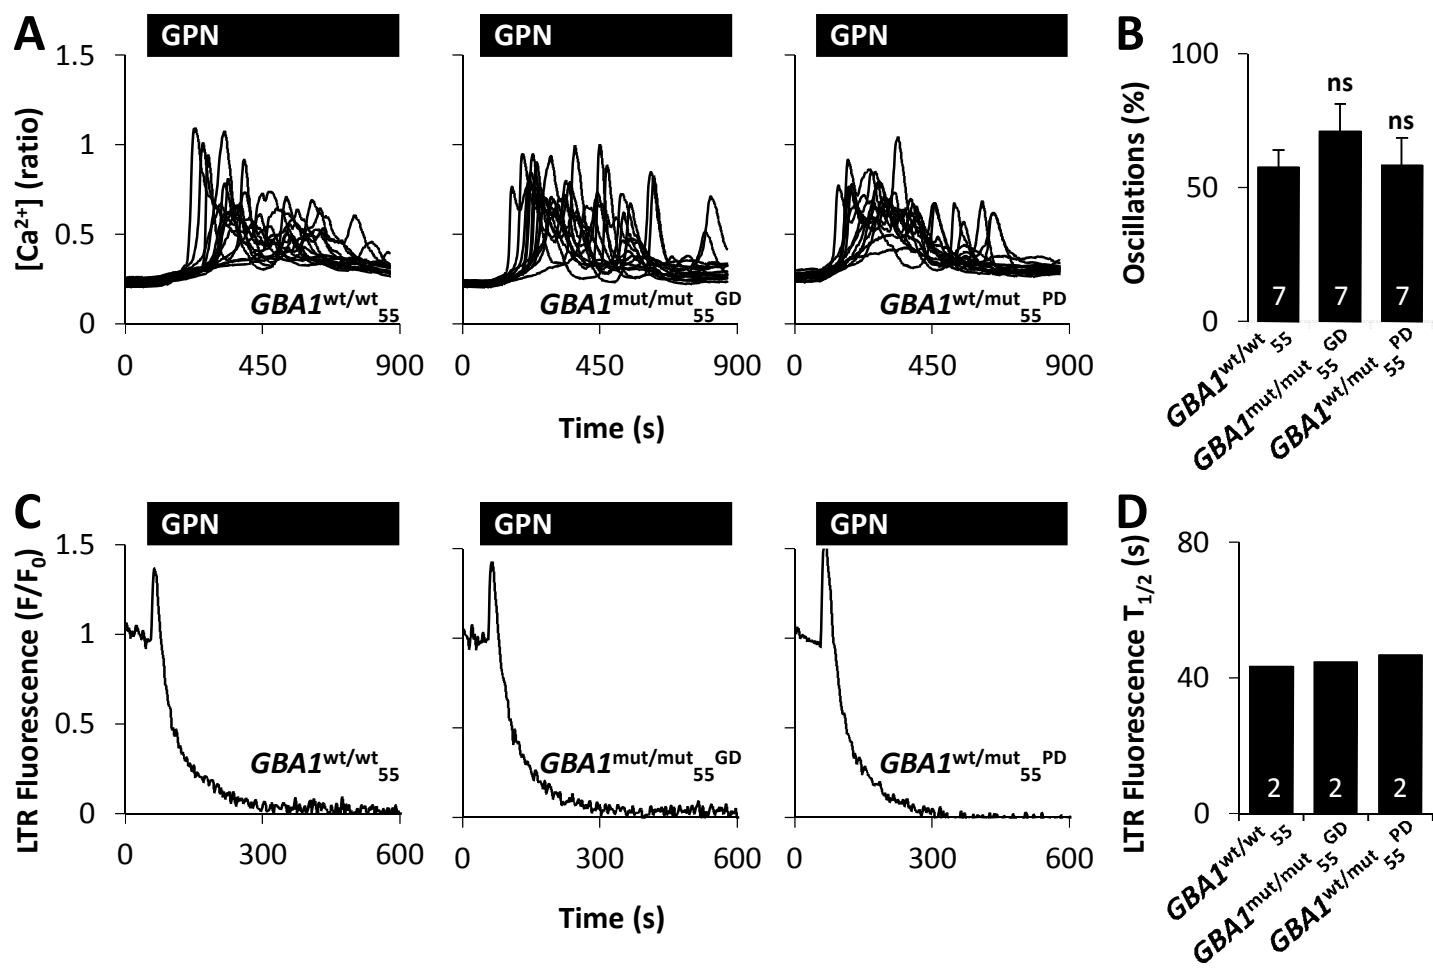

Fig. S3.
